# Supplementary material for: Changes the translator experiences within the cognitive process in a translation task of metaphorical and non metaphorical contexts using event - related potentials
Source: MDPI journal article supplement (doi:10.3390/nu14030670), 2010-01-01
Supplement: s1 [file s1]

**Table S1: Data distributions**

|                   | Mean $\pm$ SD    | Median | Minimum | Maximum | Shapiro-Wilk (P value) |
|-------------------|------------------|--------|---------|---------|------------------------|
| TEAC (mg/dL)      |                  |        |         |         |                        |
| A1                | 837.8 $\pm$ 16.7 | 841.9  | 819.5   | 852.1   | 0.59                   |
| A2                | 744.1 $\pm$ 19.4 | 734.4  | 731.5   | 766.5   | 0.14                   |
| B                 | 842 $\pm$ 39.9   | 827.3  | 811.5   | 887.1   | 0.38                   |
| C1                | 693.9 $\pm$ 72.3 | 694.5  | 621.3   | 765.9   | 0.99                   |
| C2                | 690.3 $\pm$ 34.8 | 687.3  | 657.1   | 726.4   | 0.86                   |
| D                 | 703.3 $\pm$ 17.3 | 703.2  | 686     | 720.6   | 0.99                   |
| E1                | 854.6 $\pm$ 24.4 | 856.5  | 829.3   | 877.9   | 0.87                   |
| E2                | 712.7 $\pm$ 24.6 | 712.7  | 688.2   | 737.3   | 1.00                   |
| F                 | 306.2 $\pm$ 21.8 | 314.8  | 281.4   | 322.4   | 0.33                   |
| GAE ( $\mu$ g/mL) |                  |        |         |         |                        |
| A1                | 351.1 $\pm$ 17.2 | 346.1  | 337     | 370.2   | 0.51                   |
| A2                | 325.9 $\pm$ 2.6  | 326.7  | 323     | 327.9   | 0.45                   |
| B                 | 380.6 $\pm$ 25.3 | 368.9  | 363.3   | 409.7   | 0.21                   |
| C1                | 222.3 $\pm$ 42   | 207.2  | 190     | 269.8   | 0.39                   |
| C2                | 260.6 $\pm$ 23.1 | 270.8  | 234.2   | 276.9   | 0.25                   |
| D                 | 379.3 $\pm$ 20.7 | 377.3  | 359.7   | 401     | 0.84                   |
| E1                | 314.8 $\pm$ 8.4  | 318.1  | 305.2   | 321     | 0.33                   |
| E2                | 319.4 $\pm$ 9.2  | 320.2  | 309.9   | 328.2   | 0.86                   |
| F                 | 121.6 $\pm$ 2.7  | 121.3  | 119.1   | 124.4   | 0.81                   |
| C ( $\mu$ g/mL)   |                  |        |         |         |                        |
| A1                | 1.1 $\pm$ 0.1    | 1.1    | 1.1     | 1.2     | 0.00                   |
| A2                | 0.6 $\pm$ 0      | 0.6    | 0.6     | 0.6     |                        |
| B                 | 0.5 $\pm$ 0.2    | 0.5    | 0.4     | 0.7     | 0.64                   |
| C1                | 0.8 $\pm$ 0.1    | 0.8    | 0.7     | 0.9     | 1.00                   |
| C2                | 0.9 $\pm$ 0.3    | 0.9    | 0.6     | 1.1     | 0.78                   |
| D                 | 0.4 $\pm$ 0      | 0.4    | 0.4     | 0.4     |                        |
| E1                | 1.5 $\pm$ 0.5    | 1.6    | 0.9     | 1.9     | 0.57                   |
| E2                | 1 $\pm$ 0.2      | 1.0    | 0.9     | 1.2     | 0.64                   |
| F                 | 0.3 $\pm$ 0.1    | 0.3    | 0.3     | 0.4     | 0.00                   |
| EC ( $\mu$ g/mL)  |                  |        |         |         |                        |
| A1                | 3.5 $\pm$ 0.4    | 3.7    | 3.1     | 3.8     | 0.25                   |
| A2                | 1.3 $\pm$ 0.1    | 1.4    | 1.2     | 1.4     | 0.00                   |
| B                 | 2.1 $\pm$ 0.2    | 2.1    | 1.9     | 2.2     | 0.64                   |
| C1                | 10.7 $\pm$ 1.2   | 10.6   | 9.6     | 12      | 0.82                   |
| C2                | 10.8 $\pm$ 1.8   | 8.8    | 8.8     | 12.3    | 0.54                   |
| D                 | 5.6 $\pm$ 0.3    | 5.4    | 5.4     | 5.9     | 0.00                   |

|                         |           |       |       |       |      |
|-------------------------|-----------|-------|-------|-------|------|
| <b>E1</b>               | 11.6±2.8  | 12.2  | 8.5   | 14    | 0.62 |
| <b>E2</b>               | 9.1±0.8   | 9.1   | 8.4   | 9.9   | 0.93 |
| <b>F</b>                | 2.6±0.2   | 2.7   | 2.4   | 2.8   | 0.46 |
| <b>EGCG ((µg/mL)</b>    |           |       |       |       |      |
| <b>A1</b>               | 20.7±1    | 20.5  | 19.9  | 21.8  | 0.60 |
| <b>A2</b>               | 10.9±0.9  | 10.9  | 10    | 11.7  | 0.94 |
| <b>B</b>                | 7±0.2     | 7.0   | 6.8   | 7.1   | 0.64 |
| <b>C1</b>               | 40.7±3.4  | 40.9  | 37.2  | 43.9  | 0.88 |
| <b>C2</b>               | 44.7±6.9  | 47.1  | 36.9  | 50.1  | 0.42 |
| <b>D</b>                | 11.6±0.6  | 11.9  | 10.9  | 12    | 0.16 |
| <b>E1</b>               | 43.4±20.6 | 51.1  | 20.1  | 59.1  | 0.37 |
| <b>E2</b>               | 38.2±3.2  | 37.9  | 35.2  | 41.6  | 0.83 |
| <b>F</b>                | 7.7±1     | 7.2   | 7     | 8.8   | 0.19 |
| <b>ECG (µg/mL)</b>      |           |       |       |       |      |
| <b>A1</b>               | 23.8±1.1  | 23.8  | 22.7  | 24.9  | 1.00 |
| <b>A2</b>               | 6.8±0.4   | 6.9   | 6.4   | 7.2   | 0.73 |
| <b>B</b>                | 6.3±0.1   | 6.3   | 6.2   | 6.3   | 0.00 |
| <b>C1</b>               | 24.3±2.2  | 24.2  | 22.1  | 26.5  | 0.95 |
| <b>C2</b>               | 26.2±4    | 27.3  | 21.7  | 29.5  | 0.53 |
| <b>D</b>                | 9.4±0.8   | 9.1   | 8.8   | 10.3  | 0.36 |
| <b>E1</b>               | 32.1±10.9 | 36.1  | 19.8  | 40.4  | 0.38 |
| <b>E2</b>               | 27.1±2.3  | 27.0  | 24.9  | 29.4  | 0.93 |
| <b>F</b>                | 4.7±0.2   | 4.7   | 4.5   | 4.9   | 1.00 |
| <b>Caffeine (µg/mL)</b> |           |       |       |       |      |
| <b>A1</b>               | 42.2±1.9  | 43.3  | 40.1  | 43.3  | 0.00 |
| <b>A2</b>               | 42.6±1.6  | 42.5  | 41    | 44.2  | 0.93 |
| <b>B</b>                | 15.1±0.3  | 15.1  | 14.8  | 15.4  | 1.00 |
| <b>C1</b>               | 27.6±2.7  | 28.0  | 24.8  | 30.1  | 0.77 |
| <b>C2</b>               | 29.2±4.9  | 30.4  | 23.8  | 33.4  | 0.59 |
| <b>D</b>                | 24.7±1.3  | 24.7  | 23.4  | 26    | 1.00 |
| <b>E1</b>               | 37.7±2.5  | 39.0  | 34.9  | 39.3  | 0.12 |
| <b>E2</b>               | 27.4±2.4  | 27.3  | 25.1  | 29.8  | 0.93 |
| <b>F</b>                | 112.6±5.8 | 109.3 | 109.2 | 119.3 | 0.02 |
| <b>pH</b>               |           |       |       |       |      |
| <b>A1</b>               | 3±0       | 3.0   | 3     | 3     | 1.00 |
| <b>A2</b>               | 3.1±0     | 3.1   | 3.1   | 3.1   | 1.00 |
| <b>B</b>                | 3.1±0     | 3.1   | 3.1   | 3.2   | 0.46 |
| <b>C1</b>               | 3.1±0     | 3.1   | 3.1   | 3.1   | 0.64 |
| <b>C2</b>               | 3.2±0     | 3.2   | 3.2   | 3.2   | 0.64 |
| <b>D</b>                | 3±0       | 3.0   | 3     | 3     | 0.46 |
| <b>E1</b>               | 3.2±0     | 3.2   | 3.2   | 3.3   | 0.78 |

|                                |         |     |     |     |      |
|--------------------------------|---------|-----|-----|-----|------|
| <b>E2</b>                      | 3.3±0   | 3.3 | 3.2 | 3.3 | 0.64 |
| <b>F</b>                       | 3.1±0   | 3.1 | 3   | 3.1 | 0.64 |
| <b>ETOH (%)</b>                |         |     |     |     |      |
| <b>A1</b>                      | 0.9±0   | 0.9 | 0.9 | 0.9 | 0.54 |
| <b>A2</b>                      | 1.3±0   | 1.3 | 1.3 | 1.3 | 0.84 |
| <b>B</b>                       | 0.4±0.1 | 0.4 | 0.3 | 0.4 | 0.36 |
| <b>C1</b>                      | 0.1±0   | 0.0 | 0.1 | 0.1 | 0.00 |
| <b>C2</b>                      | 0±0     | 0.0 | 0   | 0.1 | 1.00 |
| <b>D</b>                       | 0.2±0   | 0.2 | 0.2 | 0.2 | 0.64 |
| <b>E1</b>                      | 0.1±0   | 0.1 | 0.1 | 0.1 |      |
| <b>E2</b>                      | 0.1±0   | 0.1 | 0.1 | 0.1 | 0.46 |
| <b>F</b>                       | 0±0     | 0.0 | 0   | 0   |      |
| <b>Fungal Shannon index</b>    |         |     |     |     |      |
| <b>A1</b>                      | 0.7±0   | 0.7 | 0.7 | 0.7 | 0.19 |
| <b>A2</b>                      | 0.6±0   | 0.6 | 0.6 | 0.6 | 0.05 |
| <b>B</b>                       | 0±0     | 0.0 | 0   | 0   | 0.96 |
| <b>C1</b>                      | 1.7±0.1 | 1.7 | 1.7 | 1.8 | 0.65 |
| <b>C2</b>                      | 1.5±0   | 1.5 | 1.5 | 1.6 | 0.77 |
| <b>D</b>                       | 0.7±0.3 | 0.9 | 0.3 | 0.9 | 0.00 |
| <b>E1</b>                      | 0.7±0   | 0.7 | 0.7 | 0.7 | 0.27 |
| <b>E2</b>                      | 0.8±0   | 0.8 | 0.8 | 0.8 | 0.94 |
| <b>F</b>                       | 1.8±0.5 | 1.8 | 1.3 | 2.2 | 0.89 |
| <b>Microbial Shannon index</b> |         |     |     |     |      |
| <b>A1</b>                      | 0.1±0.1 | 0.1 | 0.1 | 0.2 | 0.11 |
| <b>A2</b>                      | 1.6±0.5 | 1.7 | 1   | 2   | 0.69 |
| <b>B</b>                       | 0.7±0.1 | 0.6 | 0.6 | 0.8 | 0.38 |
| <b>C1</b>                      | 0.1±0   | 0.1 | 0.1 | 0.1 | 0.79 |
| <b>C2</b>                      | 0.3±0.4 | 0.0 | 0   | 0.7 | 0.00 |
| <b>D</b>                       | 0.2±0.1 | 0.2 | 0.1 | 0.3 | 0.99 |
| <b>E1</b>                      | 0.2±0.1 | 0.2 | 0.2 | 0.3 | 0.62 |
| <b>E2</b>                      | 0.7±0.1 | 0.7 | 0.6 | 0.7 | 0.21 |
| <b>F</b>                       | 0±0     | 0.0 | 0   | 0   | 0.51 |

**Table S2: Spearman correlation between tea catechins**

|                         |    | C     | EC    | EGCG  | ECG   |
|-------------------------|----|-------|-------|-------|-------|
| Correlation Coefficient | C  | 1     | 0.599 | 0.783 | 0.875 |
| P value                 |    | .     | 0.001 | 0     | 0     |
| Correlation Coefficient | EC | 0.599 | 1     | 0.91  | 0.849 |

---

|                         |      |       |       |       |       |
|-------------------------|------|-------|-------|-------|-------|
| P value                 |      | 0.001 | .     | 0     | 0     |
| Correlation Coefficient | EGCG | 0.783 | 0.91  | 1     | 0.952 |
| P value                 |      | 0     | 0     | .     | 0     |
| Correlation Coefficient | ECG  | 0.875 | 0.849 | 0.952 | 1     |
| P value                 |      | 0     | 0     | 0     | .     |

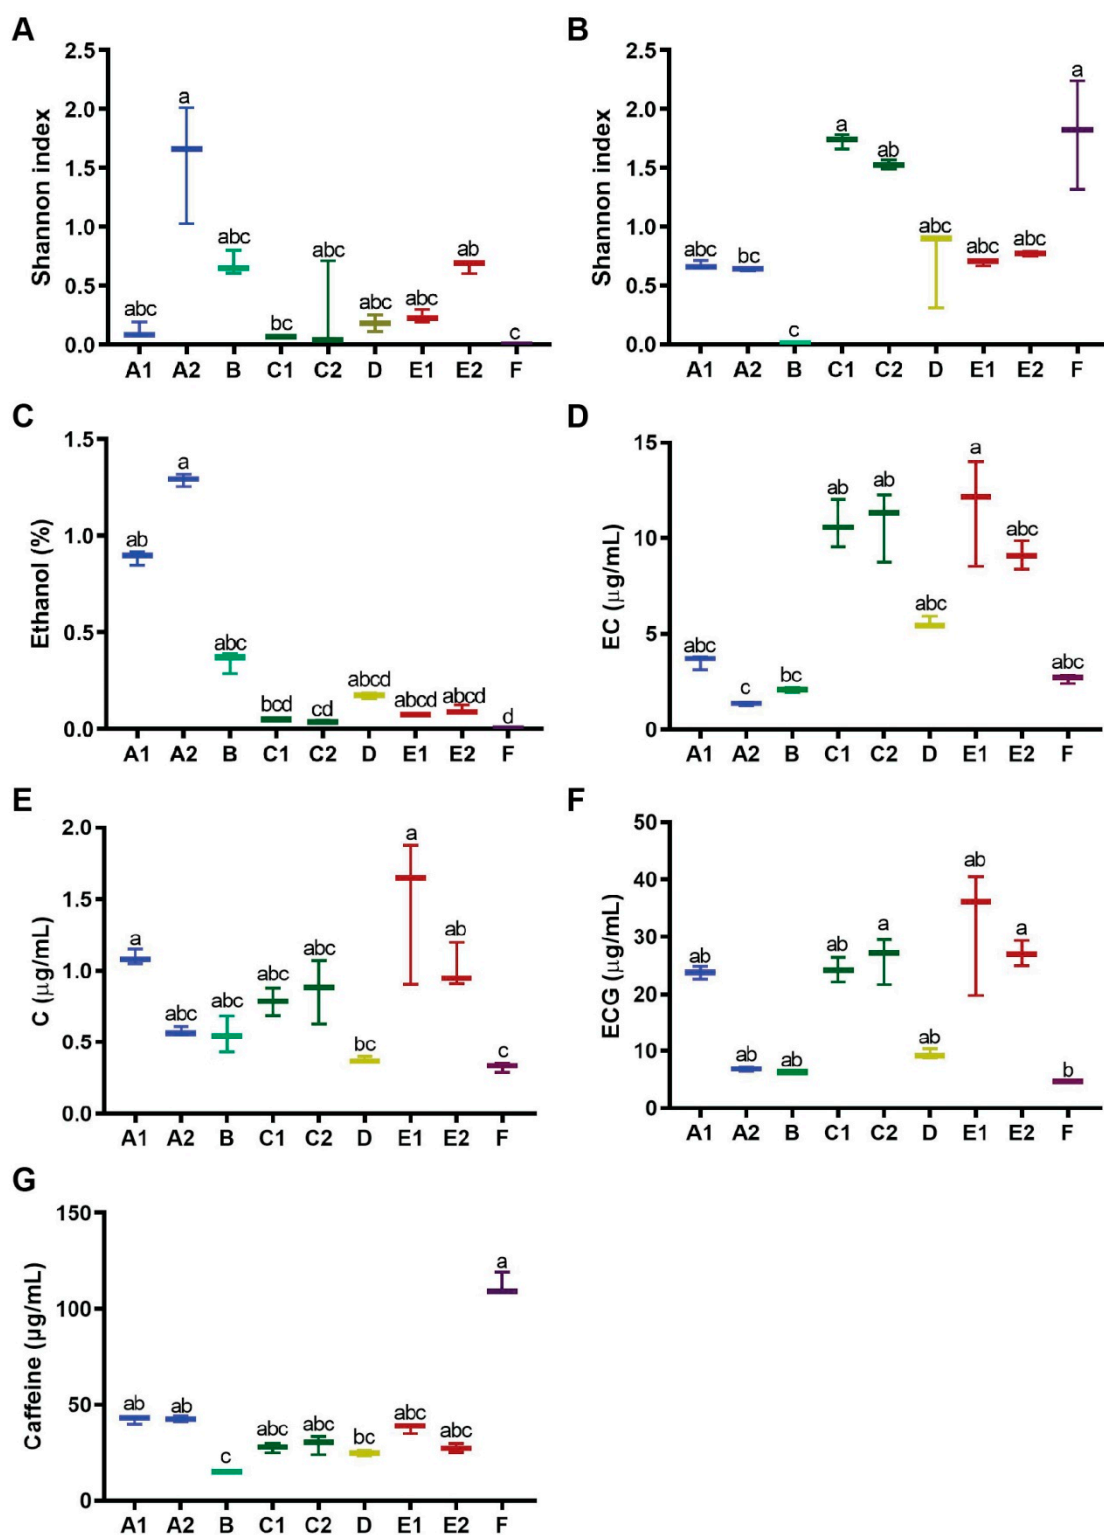

**Figure S1.** Data distributions are shown as boxplots (lines represent median, upper and lower bars represent maximum and minimum) for measures which had at least one out of nine kombucha products with  $p < 0.05$  by the Shapiro-Wilk test (a test of normality of the distribution): bacterial Shannon index (A), fungal Shannon index (B), ethanol (C), EC (D), C (E), ECG (F), and caffeine (G). Means in a column without a common letter differ by the non-parametric Kruskal-Wallis test with post-hoc Dunn test;  $p < 0.05$ .
